# Supplementary material for: Highly efficient photoanodes for dye solar cells with a hierarchical meso-ordered structure
Source: Royal Society of Chemistry journal article supplement (doi:10.1039/c3cp53344a), 2013-01-01
Supplement: c3cp53344a.pdf [file c3cp53344a.pdf]

## SUPPORTING INFORMATION

# Highly Efficient Photoanodes for Dye Solar Cells With a Hierarchical Meso-ordered Structure

*Luisa De Marco,<sup>1†\*</sup> Gabriella Di Carlo,<sup>2†\*</sup> Roberto Giannuzzi,<sup>1</sup> Michele Manca,<sup>1</sup> Cristina Riccucci,<sup>2</sup> Gabriel M. Ingo<sup>2</sup> and Giuseppe Gigli<sup>1,3,4</sup>*

<sup>1</sup> *CBN, Center for Biomolecular Nanotechnologies, Fondazione Istituto Italiano di Tecnologia - Energy Platform Via Barsanti, 73010 Arnesano (Lecce), Italy.*

<sup>2</sup> *ISMN, Institute for the Study of Nanostructured Materials, CNR, Via Salaria km 29300, 00015 Monterotondo (Rome), Italy.*

<sup>3</sup> *National Nanotechnology Laboratory (NNL), CNR Istituto Nanoscienze, c/o Distretto Tecnologico, Via Arnesano km 5, 73100 Lecce, Italy.*

<sup>4</sup> *Dipartimento di Matematica e Fisica “E. De Giorgi” - Università del Salento, via per Arnesano, 73100 Lecce, Italy*

*\*Address correspondence to: [luisa.demarco@iit.it](mailto:luisa.demarco@iit.it); [gabriella.dicarlo@ismn.cnr.it](mailto:gabriella.dicarlo@ismn.cnr.it);*

*† These authors contributed equally to the work*

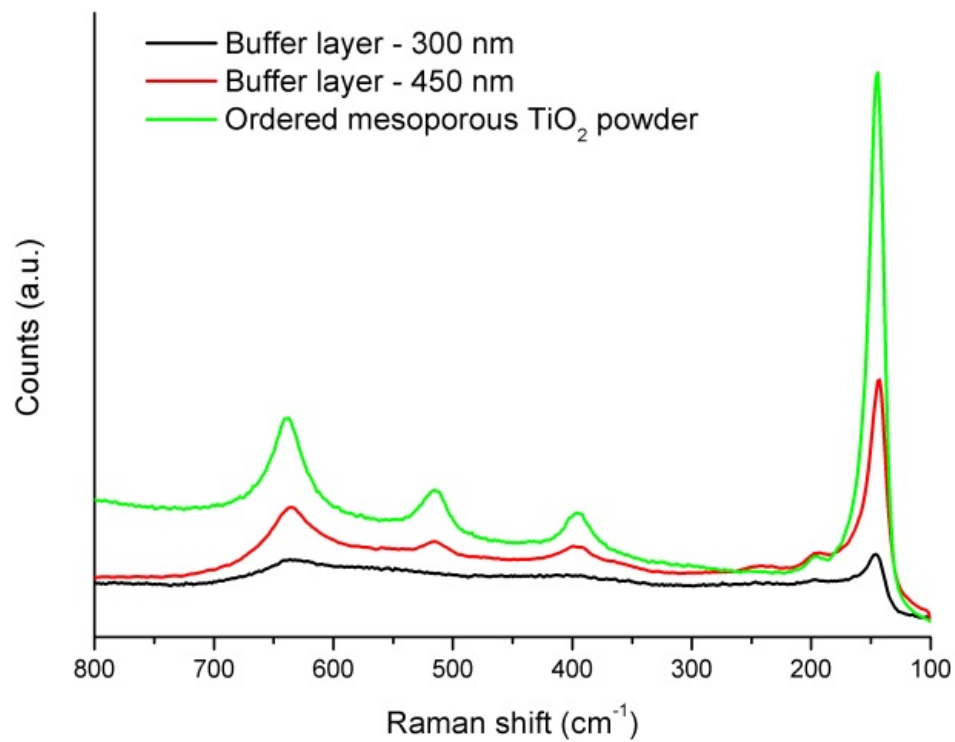

**Figure S1.** Raman spectra of mesoporous titania: (black line) thin films – 1 layer; (red line) thin films – 2 layers; (green line) powder.
